# Supplementary material for: Self-DNA release and STING-dependent sensing drives inflammation to cigarette smoke in mice
Source: PubMed Central journal article supplement (PMC6795997; doi:10.1038/s41598-019-51427-y), 2019-10-16
Supplement: 41598_2019_51427_MOESM1_ESM.pdf [file 41598_2019_51427_MOESM1_ESM.pdf]

# **Self-DNA release and STING-dependent sensing drives inflammation to cigarette smoke in mice**

**Mégane Nascimento<sup>1</sup>, Aurélie Gombault<sup>1</sup>, Norinne Lacerda-Queiroz<sup>1</sup>, Corinne Panek<sup>1</sup>, Florence Savigny<sup>1</sup>, Malak Sbeity<sup>1</sup>, Manon Bourinet<sup>1</sup>, Marc Le Bert<sup>1</sup>, Nicolas Riteau<sup>1</sup>, Bernhard Ryffel<sup>1</sup>, Valérie F.J. Quesniaux<sup>1</sup> & Isabelle Couillin<sup>1</sup>**

<sup>1</sup>University of Orleans and CNRS, INEM-UMR7355, Orleans, France

# Supplementary Figure S1

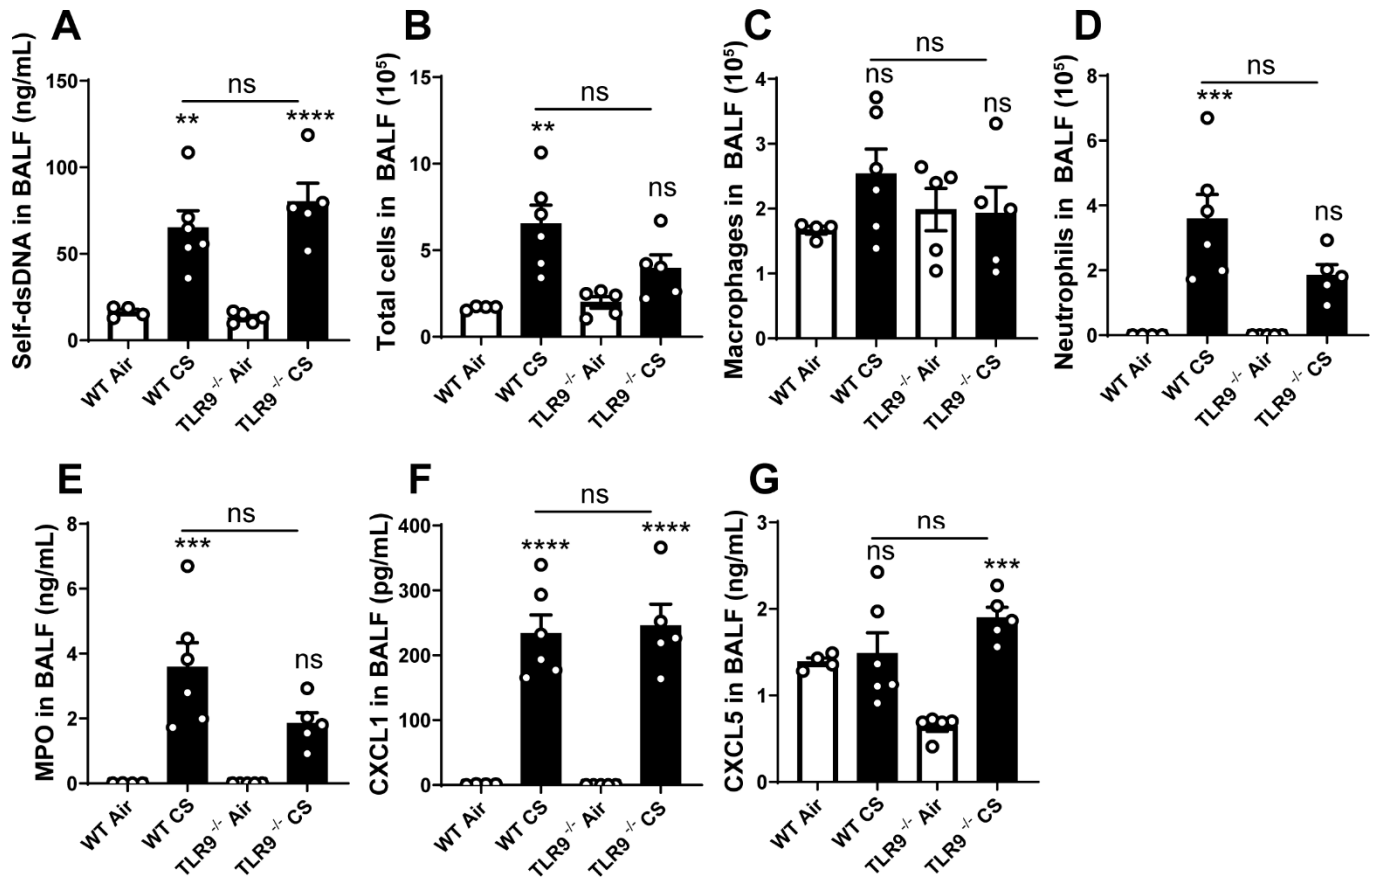

# Supplementary Figure S2

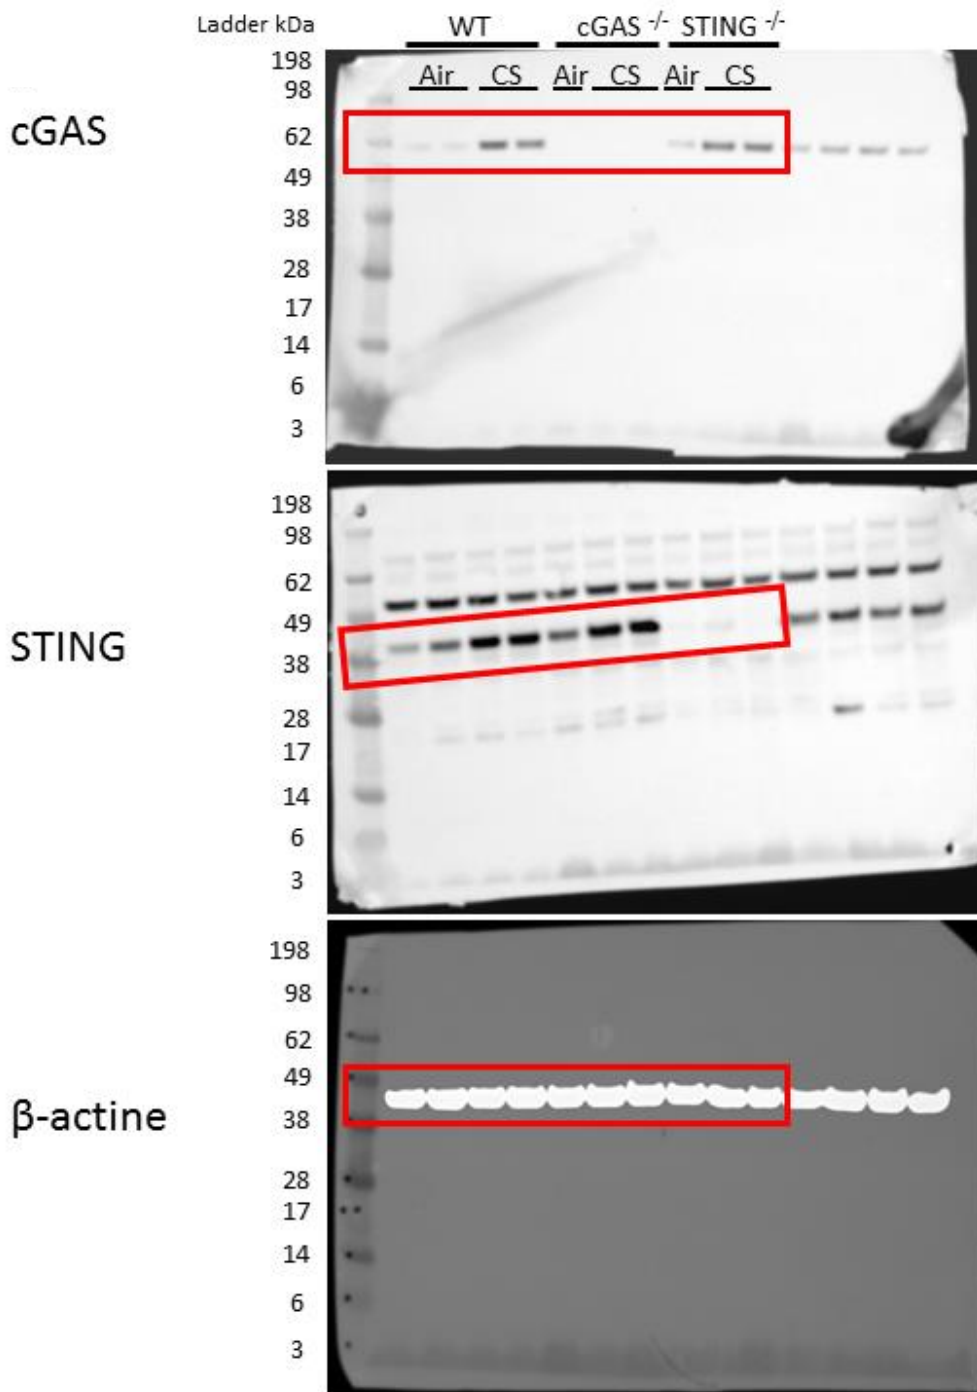

## **Supplementary Figure Legends**

**Supplementary Figure S1** DNA sensor TLR9 is not required in CS-induced lung inflammation. Self-dsDNA (**A**), total cells (**B**), macrophages (**C**) and neutrophils (**D**) recruited in BALF after CS exposure are shown. MPO (**E**), CXCL1 (**F**) and CXCL5 (**G**) levels measured in BALF are shown.

**Supplementary Figure S2** Uncropped immunoblots shown in Fig.2C.
